# Supplementary material
Source: PubMed Central journal article supplement (PMC4712441)
Supplement: ct5b00935_si_001.pdf [file ct5b00935_si_001.pdf]

## **CHARMM-GUI Input Generator for NAMD, GROMACS, AMBER, OpenMM, and CHARMM/OpenMM Simulations using the CHARMM36 Additive Force Field**

Jumin Lee,<sup>1</sup> Xi Cheng,<sup>1</sup> Jason M. Swails,<sup>2</sup> Min Sun Yeom,<sup>3</sup> Peter K. Eastman,<sup>4</sup> Justin A. Lemkul,<sup>5</sup> Shuai Wei,<sup>6</sup> Joshua Buckner,<sup>6</sup> Jong Cheol Jeong,<sup>7</sup> Yifei Qi,<sup>1</sup> Sunhwan Jo,<sup>8</sup> Vijay S. Pande,<sup>4</sup> David A. Case,<sup>2</sup> Charles L. Brooks III,<sup>6</sup> Alexander D. MacKerell Jr.,<sup>5</sup> Jeffery B. Klauda,<sup>9</sup> and Wonpil Im<sup>1\*</sup>

<sup>1</sup>Department of Molecular Biosciences and Center for Computational Biology, The University of Kansas, Lawrence, KS 66047, USA

<sup>2</sup>Department of Chemistry and Chemical Biology, Rutgers University, Piscataway, NJ 08854, USA

<sup>3</sup>Korean Institute of Science and Technology Information, Yuseong-gu, Daejeon 305-806, Korea

<sup>4</sup>Department of Bioengineering, Stanford University, Stanford, CA 94035, USA

<sup>5</sup>Department of Pharmaceutical Sciences, School of Pharmacy, University of Maryland, Baltimore, MD 21201, USA

<sup>6</sup>Department of Chemistry and the Biophysics Program, University of Michigan, Ann Arbor, MI 48109, USA

<sup>7</sup>Cancer Research Institute, Beth Israel Deaconess Cancer Center, Harvard Medical School, Boston, MA 02215, USA

<sup>8</sup>Leadership Computing Facility, Argonne National Laboratory, 9700 Cass Ave Bldg. 240, Argonne, IL 60439, USA

<sup>9</sup>Department of Chemical and Biomolecular Engineering and the Biophysics Program, University of Maryland, College Park, MD 20742, USA

\*To whom correspondence should be addressed: Tel: +1-785-864-1993; Fax: +1-785-864-5558; e-mail: [wonpil@ku.edu](mailto:wonpil@ku.edu)

**Table S1.** DPPC bilayer properties obtained from each program.

| Programs                    | Abbreviations | SA/Lipid ( $\text{\AA}^2$ )          | Compressibility (dyn/cm) |
|-----------------------------|---------------|--------------------------------------|--------------------------|
| NAMD                        | N-fsw-1       | $64.8 \pm 0.1$                       | $222.5 \pm 9.5$          |
|                             | N-fsw-2       | $62.9 \pm 0.1$                       | $227.1 \pm 7.1$          |
|                             | N-fsw-3       | $61.6 \pm 0.1$                       | $242.4 \pm 20.9$         |
| GROMACS<br>Mixed precision  | Gm-fsw-1      | $63.6 \pm 0.1$                       | $212.6 \pm 6.2$          |
|                             | Gm-fsw-2      | $61.2 \pm 0.1$                       | $213.9 \pm 7.6$          |
|                             | Gm-fsw-3      | $60.3 \pm 0.1$                       | $212.4 \pm 6.8$          |
|                             | Gm-sw-1       | $60.6 \pm 0.1$                       | $212.2 \pm 20.2$         |
|                             | Gm-sw-2       | $58.8 \pm 0.2$                       | $167.7 \pm 16.1$         |
|                             | Gm-sw-3       | $58.0 \pm 0.3^a$<br>$51.0 \pm 1.7^b$ | gel formation            |
| GROMACS<br>Double precision | Gd-fsw-1      | $63.4 \pm 0.1$                       | $210.9 \pm 8.4$          |
|                             | Gd-fsw-2      | $61.1 \pm 0.1$                       | $212.1 \pm 8.6$          |
|                             | Gd-fsw-3      | $60.4 \pm 0.1$                       | $228.1 \pm 16.6$         |
|                             | Gd-sw-1       | $60.4 \pm 0.1$                       | $218.2 \pm 13.5$         |
|                             | Gd-sw-2       | $59.1 \pm 0.1$                       | $207.0 \pm 12.2$         |
|                             | Gd-sw-3       | $58.4^{a,c}$<br>$49.3 \pm 0.4^b$     | gel formation            |
| AMBER                       | A-0.5-1       | $62.6 \pm 0.1$                       | $234.5 \pm 17.2$         |
|                             | A-0.5-2       | $60.2 \pm 0.2$                       | $228.6 \pm 18.3$         |
|                             | A-0.5-3       | $59.2 \pm 0.1^a$<br>$50.76^{b,c}$    | gel formation            |
|                             | A-1.0-1       | $62.7 \pm 0.1$                       | $247.2 \pm 11.8$         |
|                             | A-1.0-2       | $59.9 \pm 0.1$                       | $272.0 \pm 22.3$         |
|                             | A-1.0-3       | $58.7 \pm 0.2$                       | $259.4 \pm 33.8$         |
| OpenMM                      | O-fsw-5       | $61.3 \pm 0.2$                       | $250.3 \pm 10.9$         |
|                             | O-fsw-10      | $61.6 \pm 0.2$                       | $234.0 \pm 21.7$         |
|                             | O-fsw-15      | $61.4 \pm 0.2$                       | $248.6 \pm 16.3$         |
|                             | O-fsw-100     | $61.6 \pm 0.2$                       | $227.7 \pm 12.4$         |
| CHARMM/OpenMM               | CO-fsw-1      | $64.6 \pm 0.2$                       | $227.8 \pm 14.5$         |
|                             | CO-fsw-2      | $62.5 \pm 0.1$                       | $238.3 \pm 13.3$         |
|                             | CO-fsw-3      | $61.1 \pm 0.2$                       | $240.0 \pm 15.9$         |
|                             | CO-sw-1       | $61.4 \pm 0.3$                       | $251.8 \pm 17.5$         |
|                             | CO-sw-2       | $60.0 \pm 0.2$                       | $213.2 \pm 10.5$         |
|                             | CO-sw-3       | $58.9 \pm 0.3$                       | $226.3 \pm 25.2$         |

<sup>a</sup>liquid-phase property

<sup>b</sup>gel-phase property

<sup>c</sup>STE is not available because only one replica resulted in the particular phase among 5 replicas.

**Table S2.** Other lipid properties obtained from each program with the optimal protocols.

| Lipids | Programs       | SA/Lipid ( $\text{\AA}^2$ ) | Compressibility (dyn/cm) |
|--------|----------------|-----------------------------|--------------------------|
| DOPC   | NAMD           | $68.7 \pm 0.1$              | $278.0 \pm 13.4$         |
|        | GROMACS-mixed  | $68.0 \pm 0.1$              | $255.5 \pm 14.8$         |
|        | GROMACS-double | $68.0 \pm 0.1$              | $262.1 \pm 18.5$         |
|        | AMBER          | $69.7 \pm 0.1$              | $301.2 \pm 12.3$         |
|        | OpenMM         | $68.6 \pm 0.2$              | $259.5 \pm 26.9$         |
| POPC   | NAMD           | $65.0 \pm 0.1$              | $249.6 \pm 19.7$         |
|        | GROMACS-mixed  | $64.1 \pm 0.2$              | $262.5 \pm 18.2$         |
|        | GROMACS-double | $64.1 \pm 0.1$              | $242.0 \pm 9.30$         |
|        | AMBER          | $66.0 \pm 0.1$              | $270.3 \pm 18.3$         |
|        | OpenMM         | $64.7 \pm 0.1$              | $274.6 \pm 31.5$         |
| POPE   | NAMD           | $57.8 \pm 0.1$              | $270.0 \pm 15.8$         |
|        | GROMACS-mixed  | $56.7 \pm 0.1$              | $270.1 \pm 8.8$          |
|        | GROMACS-double | $56.6 \pm 0.2$              | $258.7 \pm 18.2$         |
|        | AMBER          | $58.1 \pm 0.1$              | $254.8 \pm 4.4$          |
|        | OpenMM         | $57.7 \pm 0.1$              | $266.4 \pm 24.5$         |
| POPS   | NAMD           | $56.9 \pm 0.2$              | $261.1 \pm 22.8$         |
|        | GROMACS-mixed  | $56.0 \pm 0.4$              | $262.1 \pm 33.2$         |
|        | GROMACS-double | $56.2 \pm 0.2$              | $291.6 \pm 41.4$         |
|        | AMBER          | $59.0 \pm 0.1$              | $270.5 \pm 28.5$         |
|        | OpenMM         | $56.9 \pm 0.5$              | $274.0 \pm 28.9$         |
| PSM    | NAMD           | $55.2 \pm 0.2$              | $456.4 \pm 64.8$         |
|        | GROMACS-mixed  | $54.3 \pm 0.2$              | $445.4 \pm 13.3$         |
|        | GROMACS-double | $54.6 \pm 0.1$              | $417.8 \pm 43.0$         |
|        | AMBER          | $56.6 \pm 0.3$              | $392.3 \pm 49.9$         |
|        | OpenMM         | $55.7 \pm 0.2$              | $403.2 \pm 49.9$         |

**Table S3.** The bilayer property comparison between each program and NAMD.

| Lipids | GROMACS/NAMD |           | AMBER/NAMD |           | OpenMM/NAMD |           |
|--------|--------------|-----------|------------|-----------|-------------|-----------|
|        | $A_L$ (%)    | $K_A$ (%) | $A_L$ (%)  | $K_A$ (%) | $A_L$ (%)   | $K_A$ (%) |
| DOPC   | 99.0         | 91.9      | 101.5      | 108.3     | 99.9        | 93.3      |
| POPC   | 98.6         | 105.2     | 101.5      | 108.3     | 99.5        | 110.0     |
| POPE   | 98.1         | 100.0     | 100.5      | 94.4      | 99.8        | 98.7      |
| POPS   | 98.4         | 100.4     | 103.7      | 103.6     | 100.0       | 104.9     |
| PSM    | 98.4         | 97.6      | 102.5      | 86.0      | 100.9       | 88.3      |

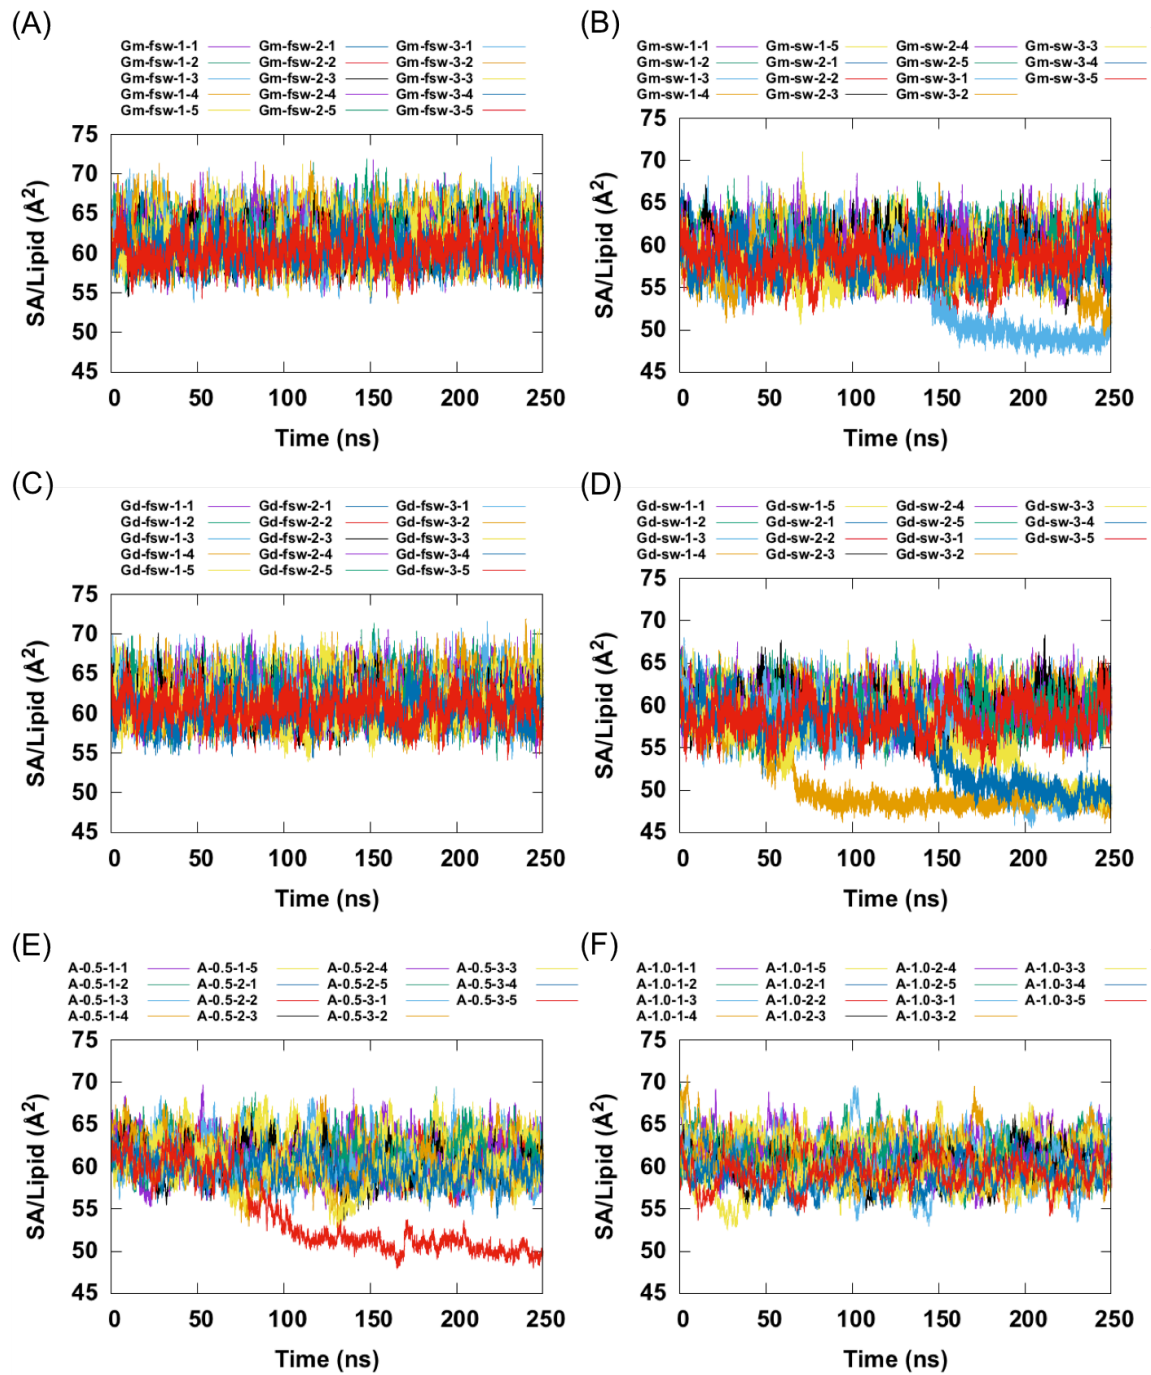

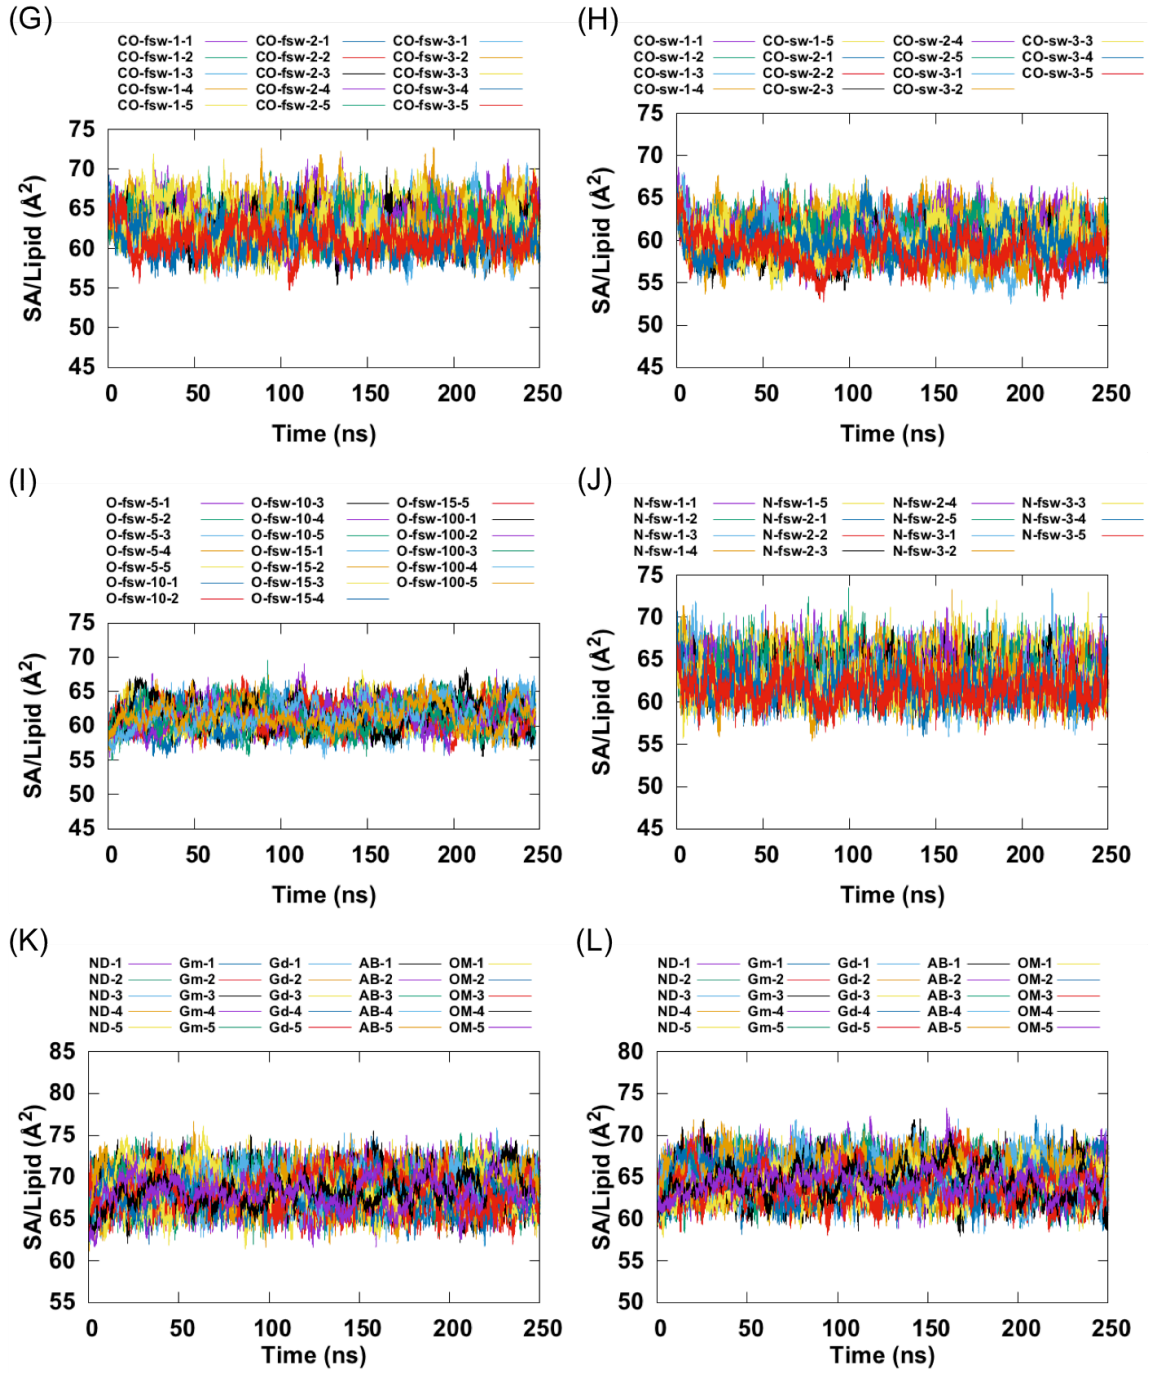

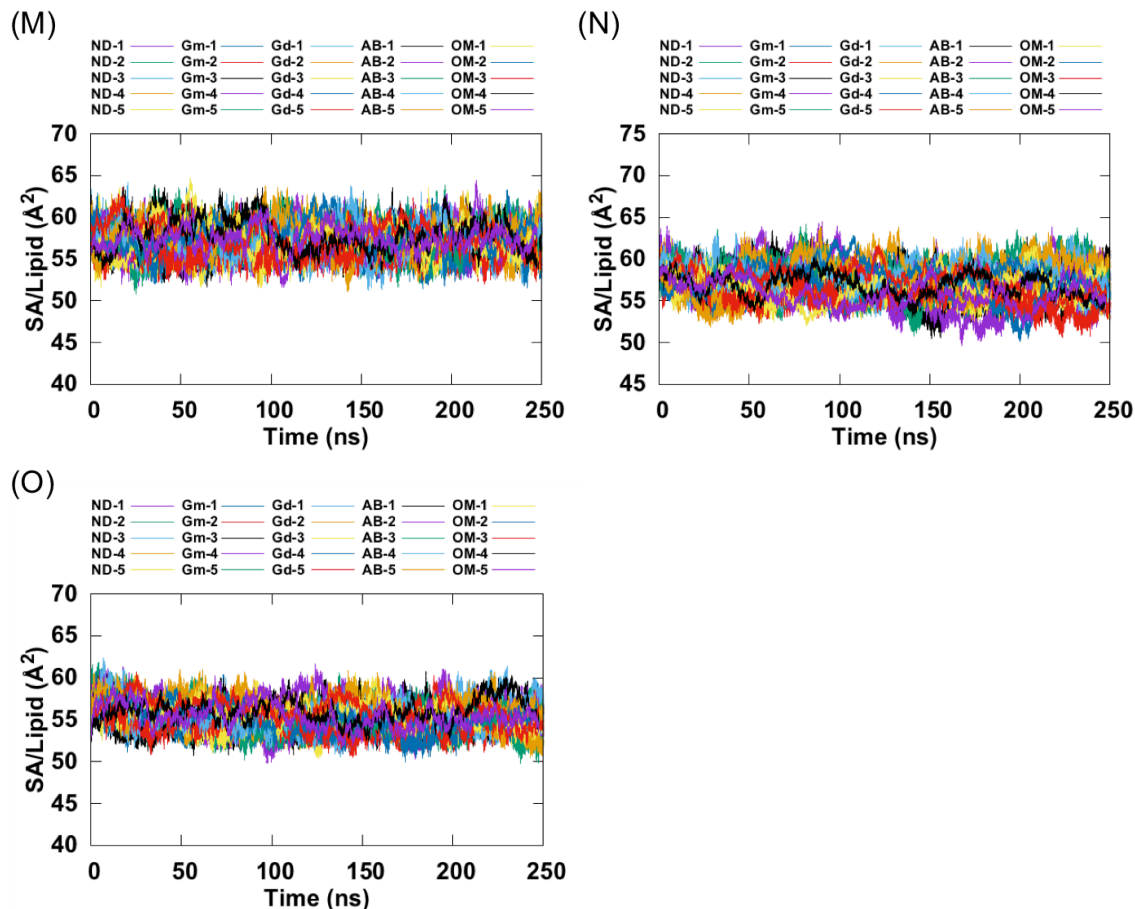

**Figure S1.** The time-series of surface area per lipid properties of (A-J) DPPC bilayer, (A) GROMACS mixed precision simulations with the force-based switching function, (B) GROMACS mixed precision simulations with the potential-based switching function, (C) GROMACS double precision simulations with the force-based switching function, (D) GROMACS double precision simulations with the potential-based switching function, (E) AMBER simulations with tau-p of 0.5 ps, (F) AMBER simulations with tau-p of 1.0 ps, (G) CHARMM/OpenMM simulations with the force-based switching function, (H) CHARMM/OpenMM simulations with the potential-based switching function, (I) OpenMM simulations, (J) NAMD simulations, (K) DOPC, (L) POPC, (M) POPE, (N) POPS, and (O) PSM bilayers.



(A)

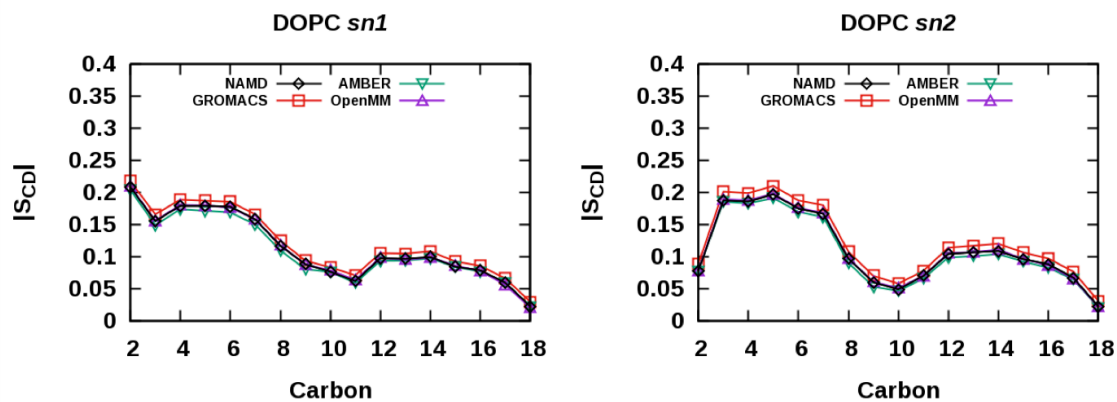

(B)

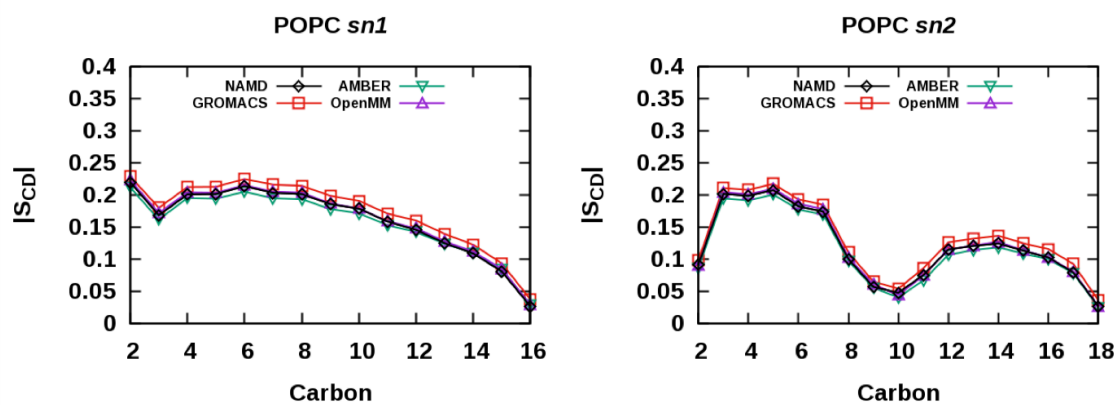

(C)

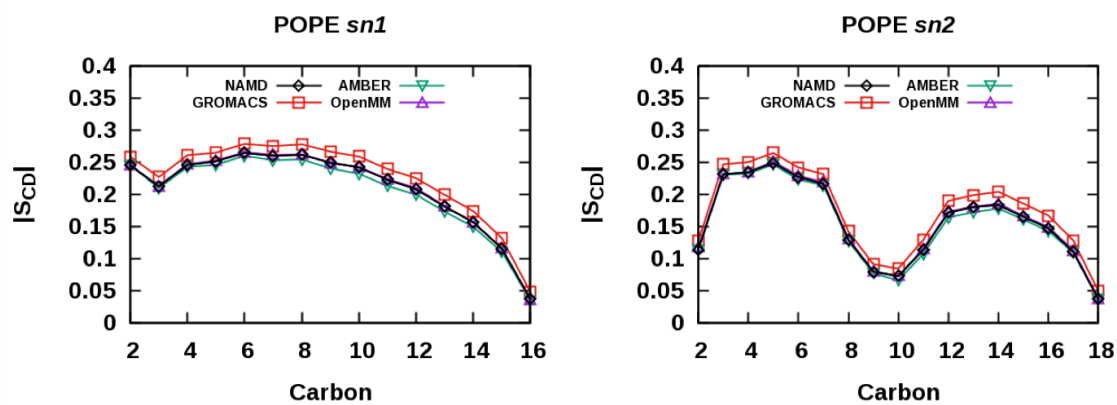

(D)

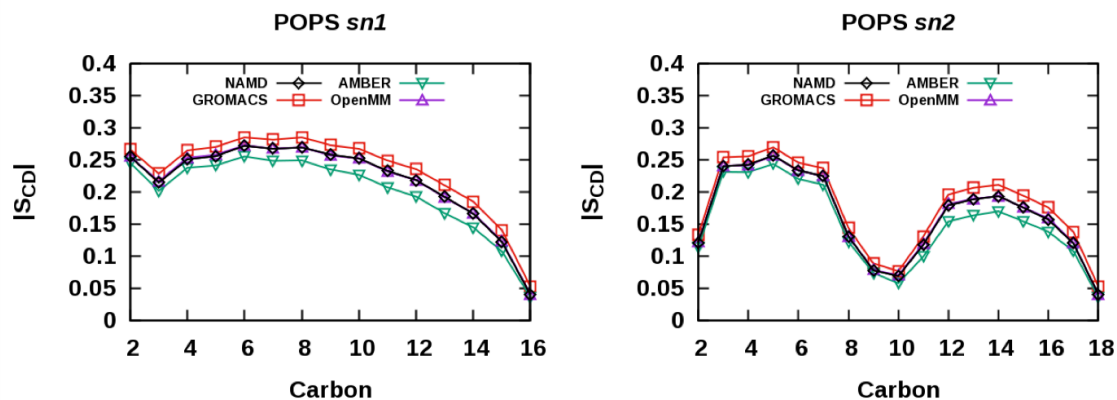

(E)

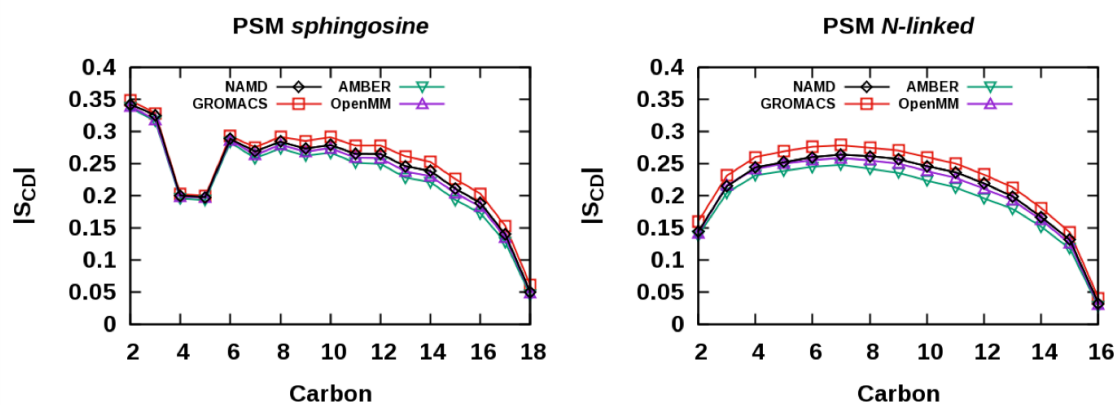

**Figure S2.** The  $S_{CD}$  order parameters of lipids derived from each program. (A) DOPC. (B) POPC. (C) POPE. (D) POPS. (E) PSM.
